# Supplementary material
Source: PubMed Central journal article supplement (PMC4418904)
Supplement: pnas.201420508SI.pdf [file pnas.201420508SI.pdf]

magnification of  $\times 42,000$  on a  $2,000 \times 2,000$ -pixel cooled CCD camera (TVIPS). The pixel size of the images was measured as  $4.10 \text{ \AA}$ , using a negatively stained catalase grid as a magnification standard (Agar Scientific). Length measurements were made on the molecular images using ImageJ (15). Molecules were selected for measurement on the basis of having a clear separation from neighboring molecules and a distinct stain outline.

**Molecular Fitting into the Desmosome Electron Tomography Maps and Generation of 3D Arrays.** The DAMMIN model was used for docking in the ET map of native epidermal desmosomes (16) (EM DataBank entry 1374). The raw, unfiltered map shows three regions

of contiguous density compatible with the dimensions of an entire mDsg2 ectodomain, plus three other regions with fragmented density. The DAMMIN model was docked into the six positions of the map compatible with entire mDsg2 ectodomains. Masks for the six docked models were generated, and sixfold averaging was applied, improving the quality of the original ET map, thus confirming the correct fitting. The six fitted models gave an approximate indication of a regular lattice. An idealized lattice model was then derived by fixing the central transdimer of mDsg2 models (as seen in Fig. 5) and applying the average translations along rows and columns. Images were produced with PyMol (17) and Chimera (18). See Movie S1 prepared with PyMol.

- Schuck P (2000) Size-distribution analysis of macromolecules by sedimentation velocity ultracentrifugation and lamm equation modeling. *Biophys J* 78(3):1606–1619.
- Hayes D, Laue T, Philo J (1995) *Program Sednterp: Sedimentation Interpretation Program* (Alliance Protein Laboratories, Thousand Oaks, CA).
- Konarev PV, Volkov VV, Sokolova AV, Koch MHJ, Svergun DI (2003) PRIMUS: A Windows-PC based system for small-angle scattering data analysis. *J Appl Cryst* 36(5):1277–1282.
- Svergun DI (1992) Determination of the regularization parameter in indirect-transform methods using perceptual criteria. *J Appl Cryst* 25(4):495–503.
- Svergun DI (1999) Restoring low resolution structure of biological macromolecules from solution scattering using simulated annealing. *Biophys J* 76(6):2879–2886.
- Volkov VV, Svergun DI (2003) Uniqueness of ab initio shape determination in small-angle scattering. *J Appl Cryst* 36(3):860–864.
- Wollscheid B, et al. (2009) Mass-spectrometric identification and relative quantification of N-linked cell surface glycoproteins. *Nat Biotechnol* 27(4):378–386.
- Brunger AT (2007) Version 1.2 of the Crystallography and NMR system. *Nat Protoc* 2(11):2728–2733.
- Sali A, Blundell TL (1993) Comparative protein modelling by satisfaction of spatial restraints. *J Mol Biol* 234(3):779–815.
- Garrod DR, Berika MY, Bardsley WF, Holmes D, Taberner L (2005) Hyper-adhesion in desmosomes: Its regulation in wound healing and possible relationship to cadherin crystal structure. *J Cell Sci* 118(Pt 24):5743–5754.
- Rai N, et al. (2005) SOMO (SOlution MOdeler) differences between X-Ray- and NMR-derived bead models suggest a role for side chain flexibility in protein hydrodynamics. *Structure* 13(5):723–734.
- Bernadó P, Mylonas E, Petoukhov MV, Blackledge M, Svergun DI (2007) Structural characterization of flexible proteins using small-angle X-ray scattering. *J Am Chem Soc* 129(17):5656–5664.
- Schneidman-Duhovny D, Hammel M, Sali A (2010) FoXS: A web server for rapid computation and fitting of SAXS profiles. *Nucleic Acids Res* 38:W540–W544.
- Rambo RP, Tainer JA (2013) Accurate assessment of mass, models and resolution by small-angle scattering. *Nature* 496(7446):477–481.
- Schneider CA, Rasband WS, Eliceiri KW (2012) NIH Image to ImageJ: 25 years of image analysis. *Nat Methods* 9(7):671–675.
- Al-Amoudi A, Diez DC, Betts MJ, Frangakis AS (2007) The molecular architecture of cadherins in native epidermal desmosomes. *Nature* 450(7171):832–837.
- The PyMOL Molecular Graphics System. Version 1.5.0.4. New York: Schrodinger, LLC.
- Pettersen EF, et al. (2004) UCSF Chimera—a visualization system for exploratory research and analysis. *J Comput Chem* 25(13):1605–1612.
- Bohne-Lang A, von der Lieth CW. GlyProt: in silico glycosylation of proteins. *Nucleic Acids Res* 2005;33:W214–W219.
- Vester-Christensen MB, et al. (2013) Mining the O-mannose glycoproteome reveals cadherins as major O-mannosylated glycoproteins. *Proc Natl Acad Sci USA* 110(52):21018–21023.
- Boggon TJ, et al. (2002) C-cadherin ectodomain structure and implications for cell adhesion mechanisms. *Science* 296(5571):1308–1313.
- Harrison OJ, et al. (2011) The extracellular architecture of adherens junctions revealed by crystal structures of type I cadherins. *Structure* 19(2):244–256.
- Larkin MA, et al. (2007) Clustal W and Clustal X version 2.0. *Bioinformatics* 23(21):2947–2948.

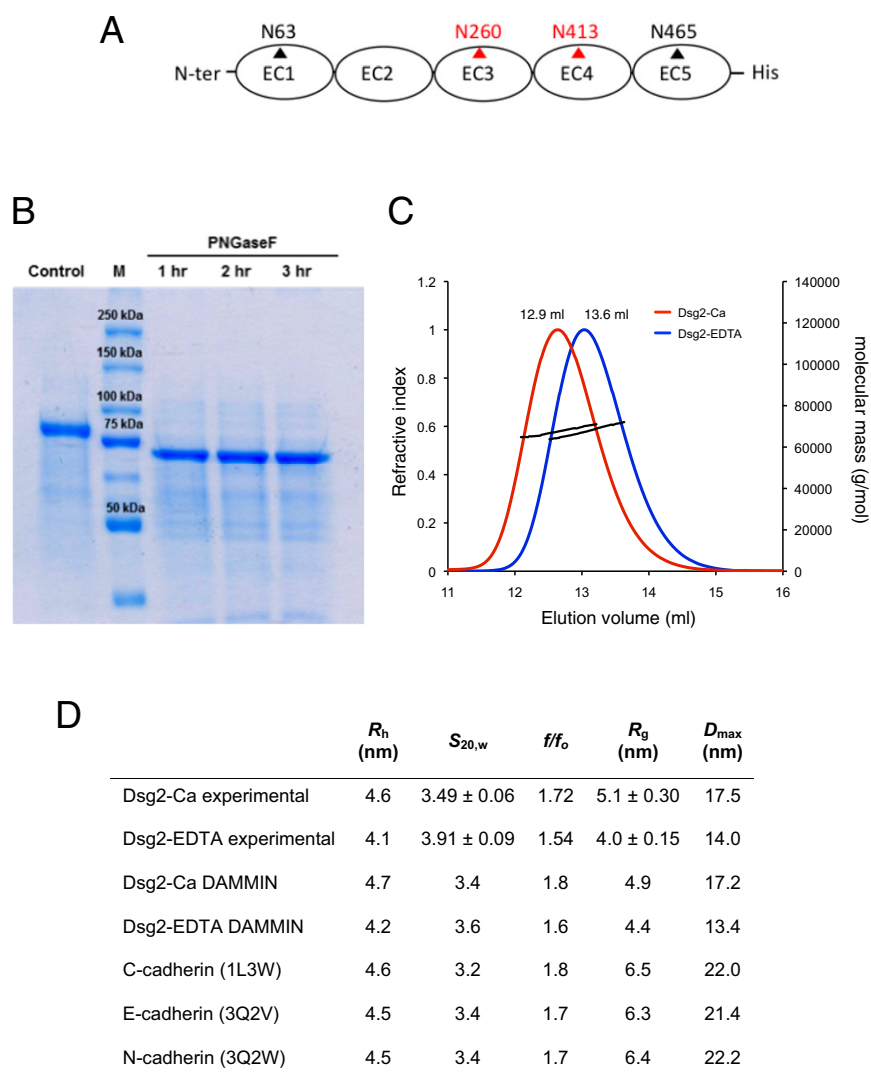

**Fig. S1.** (A) Domain architecture of the recombinant mDsg2 ectodomain (residues 1–560 from the mature chain) containing five cadherin domains, EC1–EC5, followed by a C-terminal His<sub>6</sub>-tag. Potential N-linked glycosylation sites (NetNGlyc 1.0 Server) are indicated as triangles. Sites predicted by GlyProt (19) to be exposed are shown in red. (B) SDS/PAGE with Coomassie staining of recombinant mDsg2 EC, before and after digestion with PNGase F. Lane M: standard molecular weight markers. Undigested mDsg2 (Control) migrates above 75 kDa. After treatment with PNGase F for 1–3 h, a shift is observed showing a band with lower molecular weight that corresponds to deglycosylated mDsg2. Incubations longer than 1 h have no further effect on migration. (C) SEC-MALLS profile of mDsg2-Ca and mDsg2-EDTA. The chromatogram shows refractive index (red and blue) and molecular mass (black) versus elution volume. The molecular mass measured in both cases is 68 kDa, but the elution volumes indicate a more compact structure in the absence of Ca<sup>2+</sup> (blue). (D) Table showing the hydrodynamic and dimensional data for mDsg2 determined from AUC, MALLS, and SAXS, and parameters calculated with SoMo for the SAXS ab initio model and PDB structures of type 1 cadherins.  $R_h$ , hydrodynamic radius;  $s_{20,w}$ , sedimentation coefficient in water at 20 °C;  $f/f_0$ , frictional coefficient;  $R_g$ , radius of gyration;  $D_{max}$ , maximal linear dimension of the particles.



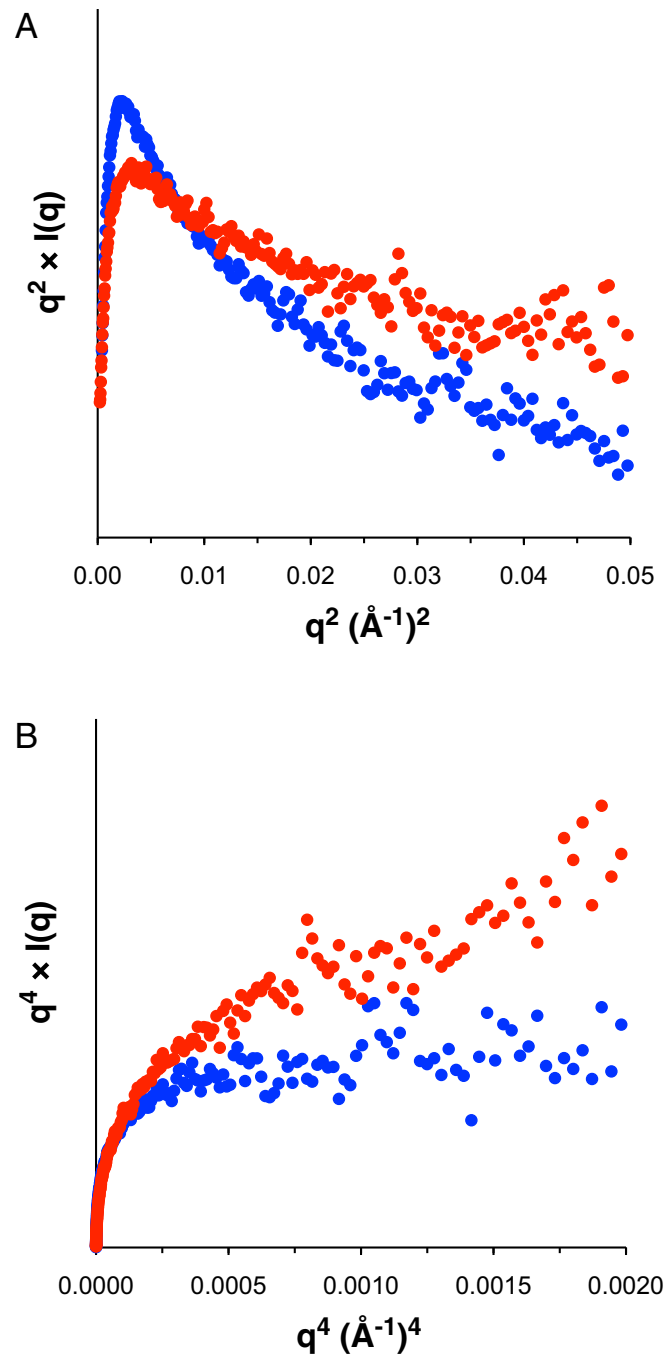

**Fig. S3.** Analysis of Dsg2 SAXS data. (A) Kratky-Debye plot in the absence (blue) and presence of  $\text{Ca}^{2+}$  (red). (B) Porod-Debye plot in the absence (blue) and presence of  $\text{Ca}^{2+}$  (red).



|            |     |                                                                |       |       |     |
|------------|-----|----------------------------------------------------------------|-------|-------|-----|
|            |     | 1-2                                                            |       |       |     |
| hDsg1      | 1   | EWIKFAAAACREGEDNSKRNPIAKIHSDCAANQ--QVYTRISGVGIDQPPYGFVFNQKGTG  | 58    |       |     |
| mDsg2      | 1   | AWITAPVALREGEDLSRKNPIAKIHSDLAEEKGLKITKYTKGKITEPPFGIFVFRNRTG    | 60    |       |     |
| hDsg2      | 1   | AWITAPVALREGEDLSKKNPIAKIHSDLAEEERGLKITKYTKGKITEPPFGIFVFNKDTG   | 60    |       |     |
| hDsg3      | 1   | EWVKFAKPCREGEDNSKRNPIAKITSDYQATQ--KITRISGVGIDQPPFGIFVVDKNTG    | 58    |       |     |
| hDsg4      | 1   | EWIKFAAAACREGEDNSKRNPIAKIRSDCESNQ--KITRISGVGIDRPPYGVFTINPRTG   | 58    |       |     |
| hDsc1      | 1   | RWAFIPASLMENSLGPPFQHVQIQSDAAQNY--TIFYISISGPGVDKPPNLFYIEKDTG    | 58    |       |     |
| hDsc2      | 1   | RWAFIPCSMLNENSLGPPFLFQQVQSDTAQNY--TIFYISIRGPGVDQEPNLFYIEKDTG   | 58    |       |     |
| hDsc3      | 1   | RWAFIPCSMQENSLGPPFLFQQVQSDTAQNY--TVFYISISGPGVDKPELNLFFYIERDTG  | 58    |       |     |
| N-Cad 3Q2W | 1   | DWVIPPINLPEENSGPPFQELVIRSDRDKNL--SLRYSVTGPGADQPPGTGIFINPISG    | 58    |       |     |
| E-Cad 3Q2V | 1   | DWVIPPISCPENEGGEPFKNLVQIKSNRDKET--KVPYSITGGADKPPVGVFIERETG     | 58    |       |     |
| C-Cad 1L3W | 1   | DWVIPPVKVSENERGPPFKRLVQIKSNKDRFN--KVYYSITGGADNPPQGVFRIEWTG     | 58    |       |     |
|            |     | 1-2                                                            | -1-2- |       |     |
| hDsg1      | 59  | EINITSIVDREVTPEFFIIYCRALNSMGQDLERPLELRVRLDINDNPPVFSMATFAGQIE   | 118   |       |     |
| mDsg2      | 61  | ELNITSILDREETPYFLLTGYALDSRGNLEKPLELRKIVLDINDNPPVFTQEVFVGSIE    | 120   |       |     |
| hDsg2      | 61  | ELNVTISILDREETPFLLTGYALDARGNNVEKPLELRKIVLDINDNPPVFTQDVFVGSVE   | 120   |       |     |
| hDsg3      | 59  | DINITAIVDREETPSFLITCRALNAQGLDVEKPLILTVKILDINDNPPVFSQVIFMGETE   | 118   |       |     |
| hDsg4      | 59  | EINITSVVDREITPFLFLYCRALNSRGEDLERPLELRVVKMDINDNPPVFSQSVYFASIE   | 118   |       |     |
| hDsc1      | 59  | DIFCTRSIDREKYEQFALYGYATADGYAPEYPLPLIIKIEDNDNAPYFHEHRTFTVP      | 118   |       |     |
| hDsc2      | 59  | NLYCTRPVDREYQESFEIIAFATPDGYPTELPLPLIIKIEDNDNAPYFTEETVFTTIF     | 118   |       |     |
| hDsc3      | 59  | NLFCTRPVDREYDVFDLIAAYASTADGYSADLPPLPVRVEDNDNHPVFTTEAIYNFEVL    | 118   |       |     |
| N-Cad 3Q2W | 59  | QLSVTKPLDRELIAHFHLRAHAVDINGNQVENPIDIVINVIDNDNRPPEFLHQVWEGSVP   | 118   |       |     |
| E-Cad 3Q2V | 59  | WLKVTQPLDREAIAKYLILYSHAVSSNGEAVEDPMEIVITVTDQNDNRPPEFTQEVFEGSVA | 118   |       |     |
| C-Cad 1L3W | 59  | WMLVTRPLDREYDKYVLSHVAEENSGSPVEEPMEITINVIDQNDNRPKFTQDVFGRSVR    | 118   |       |     |
|            |     | 2-3                                                            | 1-2   | 1-2   |     |
| hDsg1      | 119 | E NSNANTLVMILNATDADE-PNNLSKIAFKIIROEPSDS--PMFIINRNTGERTMNNF    | 175   |       |     |
| mDsg2      | 121 | ELSAAHTLVMKINATDADD-PETLNKAKVSYRIVSQEPANS--HMFYLNKDKTGEIYTTSTF | 177   |       |     |
| hDsg2      | 121 | ELSAAHTLVMKINATDADE-PNTLNSKISYRIVSLEPAYP--PVFYLKDKTGEIYTTSTV   | 177   |       |     |
| hDsg3      | 119 | E NSASNSLVMILNATDADE-PNHLNSKIAFKIVSQEPAGT--PMFLLSRNTEGVRPLTNS  | 175   |       |     |
| hDsg4      | 119 | E NSDANTLVMKICATDADE-ENHLNSKIAFKIVSQEPSGA--PMFILNRYTEGVTMTSSF  | 175   |       |     |
| hDsc1      | 119 | ENCRSGTIVGKVTATDLDE-PDTLHTRLYKILQOIPDHP--KHFSIHPDTEVITTTTFP    | 175   |       |     |
| hDsc2      | 119 | ENCRVGTIVGQVCAATKDE-PDTMHTRLKYSIIIGQVPPSP--TLFSMHTTGVITTTSSQ   | 175   |       |     |
| hDsc3      | 119 | ESSRPGTIVGVVCAATDRDE-PDTMHTRLKYSIIIGQTPRSP--GLFSVHPSGTGVITVSHY | 175   |       |     |
| N-Cad 3Q2W | 119 | E GSKPGTYVMTVTAIDADD-PNALNGMLRYRILSQAPSTPSPNMFITINTEGDIITVAAG  | 177   |       |     |
| E-Cad 3Q2V | 119 | E GAVPGTIVMKVSAATDADDVNTYNAAIAYTIVSQDPELPHKNMFTVNRDVTIVTSISG   | 178   |       |     |
| C-Cad 1L3W | 119 | E GVPQGTQVMAVSAATDEDDNIDSLNGVLSYSILKQDPEEPINPLFTINRETVGISLIGTG | 178   |       |     |
|            |     | 2-3                                                            | 1-2   | -2-3- | 3-4 |
| hDsg1      | 176 | LDREYOYGOYALAVRGSDDRDGGA-DGMSAECECNIKILDVNDIPYMEQSSYTIIEIQENTL | 234   |       |     |
| mDsg2      | 178 | LDREHSSYSLTVEARDGNGQITDKPVQQAQVQIRILDVNDIPVVENKMYEGTVEENOV     | 237   |       |     |
| hDsg2      | 178 | LDREHSSYSLTVEARDGNGEVTDKPVKQAQVQIRILDVNDIPVVENKVLGEMVEENOV     | 237   |       |     |
| hDsg3      | 176 | LDREQASSYRLVVGADKDGEG---GLSTQCECNIKVKDNDNPFMFRDSQYSARIEENIL    | 232   |       |     |
| hDsg4      | 176 | LDREQHSMYNLVVRGSDRDGAA-DGLSSECCCRKVLVDNDNPFPLEKTSYSASIEENCL    | 234   |       |     |
| hDsc1      | 176 | LDREKCDTYQLIMEVRDMGQP-FGLFNITGTTISLEEDNDNPPSFTETSIVTVEENRI     | 234   |       |     |
| hDsc2      | 176 | LDRELIDKYQLKIKVQDMDGQY-FGLQTTSTCIINIDVDNDLPTFTRTSYVTSVEENTV    | 234   |       |     |
| hDsc3      | 176 | LDREVVDKYSLIMKVDMDGQF-FGLIGTSTCIITVTDSDNDNAPFRONAYEAFVEENAF    | 234   |       |     |
| N-Cad 3Q2W | 178 | LDREKVVQYTLIIQATMEGNPTYGLSNATAVITVTDNDNPPPEFTAMTFYGEVPENRV     | 237   |       |     |
| E-Cad 3Q2V | 179 | LDRESYPTLVVQAADLQGE---GLSTAKAVITVKDINDNAPVFNPSYTGQVQVPENEV     | 235   |       |     |
| C-Cad 1L3W | 179 | LDREKFPPEYTLVQATDLEGA---GLSVEGKAIITQITDANDNAPIFDPKTYTALVPENEI  | 235   |       |     |
|            |     | 2-3                                                            | 2-3   | 3-4   |     |
| hDsg1      | 235 | NSNLEIRVIDLDEEFSANWMAVIFVIFSGNEGNWFEIEMNERTNVGILKVVKPLDYEAMQ   | 294   |       |     |
| mDsg2      | 238 | NVEVMRIKVTDADEVGSDNWLANFTFASGNEGYYFHIEDTQTNREGIVTLVKEVDYEEEMK  | 297   |       |     |
| hDsg2      | 238 | NVEVTRIKVFDADIEGSDNWLANFTFASGNEGYYFHIEDTQTNREGIVTLVKEVDYEEEMK  | 297   |       |     |
| hDsg3      | 233 | SSELLRFQVTDLDEEYTDNWLAVYFFTSNGNEGNWFEIQDTPRTNEGILKVVKALDYEQIQ  | 292   |       |     |
| hDsg4      | 235 | SSELLRLQATDLDEEGTDNWLAYQLLSGNDGNWFDIQTDPQTNREGILKVVKMLDYEQAP   | 294   |       |     |
| hDsc1      | 235 | DVEILRMKVDQDLPNTPHASKAVYKILQCNENGNFIIISTDPNTEGVLVCVKPLNYEVNR   | 294   |       |     |
| hDsc2      | 235 | DVEILRVTVEDKDLVNTANWRANFTILKGNENGNFKIVTDAKTNEGVLVCVKPLNYEEKQ   | 294   |       |     |
| hDsc3      | 235 | NVEILRPIEDKDLINTANWRANFTILKGNENGNFKIVTDAKTNEGVLVCVKPLNYEENR    | 294   |       |     |
| N-Cad 3Q2W | 238 | DVIVANLTVTDKQPHTPAWNAAYRISGGDPTGRFAILTDPNSNDGLVTVVKPIDFETNR    | 297   |       |     |
| E-Cad 3Q2V | 236 | NARIATLKVTDADDAPNTPAWKAVYTVVN-DPDQQFVVVTDPTTNDGILKTAAGLDFEAKQ  | 294   |       |     |
| C-Cad 1L3W | 236 | GFEVQRLSVTDLMPGTPAWQAVYKIRV-NEGGFFNITDPESNQGIITTAAGLDFELRK     | 294   |       |     |

Fig. S5. (Continued)

|            |     |               |               |           |         |         |                                 |                                         |                                 |                                 |       |                         |                       |                       |                      |
|------------|-----|---------------|---------------|-----------|---------|---------|---------------------------------|-----------------------------------------|---------------------------------|---------------------------------|-------|-------------------------|-----------------------|-----------------------|----------------------|
|            |     |               | 2-3           |           | 3--4    |         | 4-5                             |                                         |                                 |                                 |       |                         |                       |                       |                      |
| hDsg1      | 295 | SLQLSIGVRNKA  | EFHH-SIMSQYK  | KASAI     | SVTVLNV | IE      | GPVFRPGSKTYV                    | VVIENMGS-- 351                          |                                 |                                 |       |                         |                       |                       |                      |
| mDsg2      | 298 | KLDSLIIIVTKA  | AFHK-SILSKYK  | ATPIPI    | TVKVKNV | VE      | GIHFKSSVVSFRAS                  | EAMDRSS 356                             |                                 |                                 |       |                         |                       |                       |                      |
| hDsg2      | 298 | NLDFSIVIVANKA | AFHK-SIRSKYK  | PTPIPI    | KVKVKNV | VE      | GIHFKSSVIVSVS                   | ESMDRSS 356                             |                                 |                                 |       |                         |                       |                       |                      |
| hDsg3      | 293 | SVKLSIAVKNKA  | EFHQ-SVISRYR  | VQSTPV    | TIQVIN  | REGIA   | FRPASKTFTVQ                     | IGISSKK 351                             |                                 |                                 |       |                         |                       |                       |                      |
| hDsg4      | 295 | NIQLSIGVKNQAD | FHY-SVASQF    | QMHTPP    | VRIQVVD | REGPA   | FHPSTMAFSVR                     | EIGIKSS 353                             |                                 |                                 |       |                         |                       |                       |                      |
| hDsc1      | 295 | QVLLQVGVINEA  | QFSKAASSQ     | TPMCTT    | TVTVKI  | IDSDE   | GPECHPPVKVI                     | QSDGPPAQ 354                            |                                 |                                 |       |                         |                       |                       |                      |
| hDsc2      | 295 | QMLLQIGVVNEA  | PFSSREAS-PR   | SAMSTAT   | VTVNVED | ODE     | GPECNPPIQTV                     | RMKENAEVGT 353                          |                                 |                                 |       |                         |                       |                       |                      |
| hDsc3      | 295 | QVNLEIGVNNEA  | PFARDIP-RVTAL | NRLVTV    | VHVRD   | DE      | GPECTAAQYV                      | RKENLAVGS 353                           |                                 |                                 |       |                         |                       |                       |                      |
| N-Cad 3Q2W | 298 | MFVLTVAENOV   | FLA-KGIQH     | PPQSTAT   | VSVTV   | VIDV    | NENPFYFAPN                      | KIIRQEBLHAGT 355                        |                                 |                                 |       |                         |                       |                       |                      |
| E-Cad 3Q2V | 295 | QYILHVRVNEE   | PEFE-GSLVP    | ---       | STATV   | TVDV    | VVDNEA                          | PIFMPAERRVEVPEDFGVGQ 349                |                                 |                                 |       |                         |                       |                       |                      |
| C-Cad 1L3W | 295 | QYVLLQITVNE   | AEFFS---      | VPLP-     | ---     | STATV   | TVTV                            | VEDVNEAPFFVPAVSRVDVSEDLRSGE 349         |                                 |                                 |       |                         |                       |                       |                      |
|            |     |               |               |           |         |         |                                 |                                         |                                 |                                 |       |                         |                       |                       |                      |
|            |     |               | 3-4           | 3-4       |         | 4-5     |                                 |                                         |                                 |                                 |       |                         |                       |                       |                      |
| hDsg1      | 352 | --NDKVGDFVAT  | DLDTGRPS      | ITVRY     | VMGNPN  | PADLLAV | DSRTGKLT                        | LKNKVIKE-QYNMLG 408                     |                                 |                                 |       |                         |                       |                       |                      |
| mDsg2      | 357 | L-SRSIGNFQV   | DEDTG-QA      | KVYV      | KVQD    | TN      | NWVSVDSVTSEIKLVKIP              | DPE-SRYVQN 413                          |                                 |                                 |       |                         |                       |                       |                      |
| hDsg2      | 357 | K-GQIIGNFQAF  | DEDTG-LPA     | HARY      | VKLE    | DRDN    | WISVDSVTSEIKLAKLP               | DPE-SRYVQN 413                          |                                 |                                 |       |                         |                       |                       |                      |
| hDsg3      | 352 | LVDIILGTYQAI  | DEDTNKAAS     | NVKY      | VMGR    | NDGGY   | LMDSKTAEIKFVKNMNR               | D-SFFIVN 410                            |                                 |                                 |       |                         |                       |                       |                      |
| hDsg4      | 354 | LLNYVLGTYAI   | DLDTGNPA      | LDVRY     | IIGH    | DAGS    | WLKIDSRTGEIQFSREFDKK-SKYIIN 412 |                                         |                                 |                                 |       |                         |                       |                       |                      |
| hDsc1      | 355 | E---LLGYKALD  | PEIS-SG       | EGLRY     | QKLG    | DEDN    | WFENQHTGDLR                     | TLKVLRE-SKRVKN 408                      |                                 |                                 |       |                         |                       |                       |                      |
| hDsc2      | 354 | T---SNGYKAYD  | PETR-SS       | GIRY      | KKLT    | DP      | CGWITIDEISGSIITSKIL             | DRE-AETIKN 407                          |                                 |                                 |       |                         |                       |                       |                      |
| hDsc3      | 354 | K---INGYKAYD  | PENR-NG       | NGLRY     | KKLD    | PK      | GWITIDEISGSIITSKIL              | DRE-VETPKN 407                          |                                 |                                 |       |                         |                       |                       |                      |
| N-Cad 3Q2W | 356 | M---LTLTAQD   | PDY-MQ        | NI        | RYTK    | LS      | DPANLKDIPVNGQIT                 | TTIAVLDRE-SPNVKN 409                    |                                 |                                 |       |                         |                       |                       |                      |
| E-Cad 3Q2V | 350 | E---ITSYTA    | REPDTE-MD     | OKI       | TYR     | WR      | DANWLEINPETGAI                  | FTRAEMDRDABEHVN 404                     |                                 |                                 |       |                         |                       |                       |                      |
| C-Cad 1L3W | 350 | K---IISLVAQ   | DDPKQ-QI      | OKLS      | YFI     | GN      | PARWLTVNKDN                     | GIVTGNLDRRE-SEYVQN 403                  |                                 |                                 |       |                         |                       |                       |                      |
|            |     |               |               |           |         |         |                                 |                                         |                                 |                                 |       |                         |                       |                       |                      |
|            |     |               | 3-4           |           | -4-5-   |         | 4-5                             |                                         |                                 |                                 |       |                         |                       |                       |                      |
| hDsg1      | 409 | GKYQGTILS     | DDNL-QRTCT    | GTININIQ  | SPND    | -----   | DRNT--EP                        | NKTIITNIG 456                           |                                 |                                 |       |                         |                       |                       |                      |
| mDsg2      | 414 | GTYTARVVAI    | SEKHPQ        | KTITG     | TIVIT   | VEDV    | NDNCPVLVDS                      | SVRSVCEDE--EYVNVVAEADL 471              |                                 |                                 |       |                         |                       |                       |                      |
| hDsg2      | 414 | GTYTIVKIVAI   | SEDPK         | KTITG     | TVLIN   | VEDV    | INDNCP                          | TLIEPVQTI                               | CHD--AEYVNVVAEADL 471           |                                 |       |                         |                       |                       |                      |
| hDsg3      | 411 | KTIITAEVLA    | IDEYT-GKT     | ATCT      | ICIE    | VPD     | INDYCP                          | NIFPERRTICID--SPSVLISVNEH 467           |                                 |                                 |       |                         |                       |                       |                      |
| hDsg4      | 413 | GIYTAELI      | LAIDGS-GK     | ATCT      | ICIE    | VPD     | INDYCP                          | NIFPERRTICID--SPSVLISVNEH 469           |                                 |                                 |       |                         |                       |                       |                      |
| hDsc1      | 409 | NQYNI         | SVVA          | AVG--R    | SCTG    | TLV     | HLDV                            | NDHAPQIDKE-VTICQN-NEDFAVLPVDP 464       |                                 |                                 |       |                         |                       |                       |                      |
| hDsc2      | 408 | GIYNI         | TVL           | ASDQGG--R | TCG     | TLG     | ILOQ                            | VNDNSPFPKKTVIICKP-TMSSAEIVAVDP 464      |                                 |                                 |       |                         |                       |                       |                      |
| hDsc3      | 408 | ELYNIT        | TVL           | ASDQGG--R | TCG     | TLV     | AVNIEDV                         | NDNPEILLQYVVICPK-KMGYTDILAVDP 464       |                                 |                                 |       |                         |                       |                       |                      |
| N-Cad 3Q2W | 410 | NIY           | NAT           | FLAS      | NGIP    | PPMS    | GTCTLQI                         | YLLDINDNAPQVLPQEAETCETPEPNSINITALDY 469 |                                 |                                 |       |                         |                       |                       |                      |
| E-Cad 3Q2V | 405 | STYVALI       | IATDDG        | SPIAT     | CTCT    | LLV     | LLVLDV                          | NDNAPIPEPRNMQFCQR-NPQPHITIPILDP 463     |                                 |                                 |       |                         |                       |                       |                      |
| C-Cad 1L3W | 404 | NYT           | IVIM          | LVTD      | DGVS    | VG      | IGTGLL                          | LHLVLDVNDN                              | GPVPSPRVFTMCDQ-NPEPQVLTISDA 462 |                                 |       |                         |                       |                       |                      |
|            |     |               |               |           |         |         |                                 |                                         |                                 |                                 |       |                         |                       |                       |                      |
|            |     |               | 4-5           | 4-5       |         |         | 4-5                             |                                         |                                 |                                 |       |                         |                       |                       |                      |
| hDsg1      | 457 | E-----        | -----         | -----     | -----   | -----   | -----                           | QESTSST-NYD                             | STSTSSSQ 476                    |                                 |       |                         |                       |                       |                      |
| mDsg2      | 472 | DGAQNS        | APF           | SFSI      | IDQ     | PPG     | TAQ                             | KWKITH--QESTSV                          | LLQSEKRRG-RSEIPFLISDSQ 528      |                                 |       |                         |                       |                       |                      |
| hDsg2      | 472 | DGHFNS        | GPF           | SFSVID    | KPPG    | MAE     | KWKIAR--QESTSV                  | LLQSEKKG-RSEIQFLISDNOG 528              |                                 |                                 |       |                         |                       |                       |                      |
| hDsg3      | 468 | N-NRY         | TG            | PY        | FA      | LD      | QV                              | KLPVAVWSITL-NATS                        | SALLRAEQIIPPG-VYHISLVLDSDQN 524 |                                 |       |                         |                       |                       |                      |
| hDsg4      | 470 | S---Y         | GS            | PFT       | CV      | VD      | PPGI                            | ADMWVRS-TATS                            | AILTAQVLSPG-FYEIPILVLDVSN 524   |                                 |       |                         |                       |                       |                      |
| hDsc1      | 465 | DGPEN         | GPP           | QFF       | FL      | DS      | NSA---KNWN                      | IEE-KDGK                                | TAILRQRQLDYN-YYSVPIQIKDRHG 519  |                                 |       |                         |                       |                       |                      |
| hDsc2      | 465 | DEPIH         | GPP           | FD        | SLES    | ST      | SEVQ                            | RMWRKAI-NDTA                            | ARLSYQNDPPFG-SYVVPITVDRDLG 522  |                                 |       |                         |                       |                       |                      |
| hDsc3      | 465 | DEPVH         | GAP           | FY        | SL      | PN      | TS                              | PEIS                                    | RSLWSLTKV-NDTA                  | ARLSYQKNAGFQ-EYTIPIITVDRAG 522  |       |                         |                       |                       |                      |
| N-Cad 3Q2W | 470 | DIDF          | NAG           | PF        | AD      | PL      | SP                              | VTIKR                                   | NWTINRL-NGD                     | FAQLNLKIKFLEAGIYEVPIITDSDGN 528 |       |                         |                       |                       |                      |
| E-Cad 3Q2V | 464 | DLPP          | NT            | SP        | FA      | EL      | THG---ASV                       | NWTIEY                                  | NDAAQESLILQPRKDL                | EIGEYKIHKLADNQN 520             |       |                         |                       |                       |                      |
| C-Cad 1L3W | 463 | DIPP          | NT            | YP        | YK      | VS      | LSHG---SD                       | LTKAEL-DSK                              | GTSMLLSP                        | TQQLKKGDSIYVLLSDAQN 518         |       |                         |                       |                       |                      |
|            |     |               |               |           |         |         |                                 |                                         |                                 |                                 |       |                         |                       |                       |                      |
| hDsg1      | 477 | VYSSE         | PG            | NG        | AK      | DL      | LSDN-----                       | 494                                     |                                 |                                 |       |                         |                       |                       |                      |
| mDsg2      | 529 | FSC           | PER           | Q         | V       | L       | TV                              | CE                                      | LKGGGC                          | VAAQYDNYVG 560                  |       |                         |                       |                       |                      |
| hDsg2      | 529 | FSC           | PE            | R         | Q       | V       | L                               | T                                       | V                               | CE                              | LKGGG | CREAQHDSYVG 560         |                       |                       |                      |
| hDsg3      | 525 | NR            | CE            | MP        | R       | S       | L                               | T                                       | LE                              | V                               | C     | QDNRGICGTSYPTSPG 556    |                       |                       |                      |
| hDsg4      | 525 | RAC           | E             | L         | A       | Q       | M                               | V                                       | Q                               | L                               | Y     | ACDCDDNHMCLDSGAGIYT 556 |                       |                       |                      |
| hDsc1      | 520 | LVA           | --            | TH        | M       | L       | T                               | V                                       | R                               | V                               | C     | D                       | CSPTSECRMKDKSTRDV 549 |                       |                      |
| hDsc2      | 523 | MSS           | --            | V         | T       | S       | L                               | D                                       | V                               | T                               | L     | C                       | D                     | CITENDCTHRVDRIGG 552  |                      |
| hDsc3      | 523 | QAA           | --            | T         | K       | L       | R                               | V                                       | N                               | L                               | C     | E                       | C                     | THTPTQCRATSRSTGVI 552 |                      |
| N-Cad 3Q2W | 529 | FP            | K             | S         | I       | S       | I                               | L                                       | R                               | V                               | K     | V                       | C                     | Q                     | CDSNGDCTDV----- 553  |
| E-Cad 3Q2V | 521 | KD            | Q             | --        | V       | P       | T                               | L                                       | D                               | V                               | H     | V                       | C                     | D                     | CEGTVNNCMKA----- 544 |
| C-Cad 1L3W | 519 | NP            | Q             | --        | L       | T       | V                               | N                                       | A                               | T                               | V     | C                       | S                     | E                     | GKAIKQ----- 540      |

**Fig. S5.** Sequence alignments of desmosomal cadherins, including four human Dsgs (hDsg1–hDsg4), mouse Dsg 2 (mDsg2), three human Dscs (hDsc1–hDsc3), and type 1 N-, E-, and C-cadherins with known 3D full-ectodomain structure (indicated by their PDB ID codes). Calcium-binding residues are highlighted in yellow (side chain coordination) and green (main chain coordination). Numbering on top (blue) indicates the corresponding interdomain region (e.g., 1–2 is EC1–EC2). Residues with nonconserved side chain coordination are indicated in red. Predicted sites of N-linked and O-mannosyl glycosylation are highlighted in magenta and cyan, respectively; residues in bold correspond to glycosylation sites confirmed by mass spectrometry (7, 20) or X-ray crystallography (21, 22). Alignment made with ClustalX (23) and annotated manually.



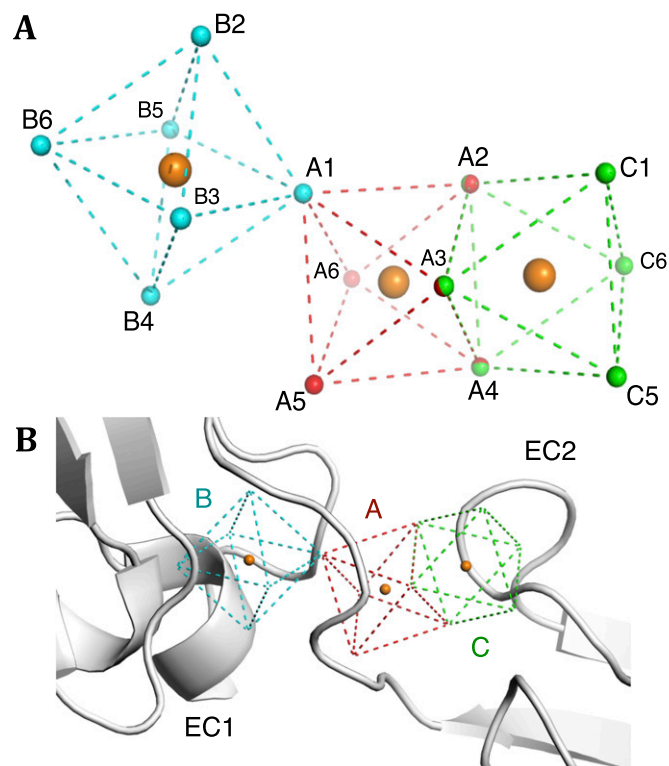

**Fig. S6.** Topology of the interdomain calcium binding sites, in type 1 cadherin extracellular domains, based on the structural information of the PDB structures 1L3W, 3Q2V, and 3Q2W (21, 22). (A) Each interdomain region contains three calcium-binding sites, A, B, and C, where each calcium ion is surrounded by six ligands in octahedral coordination. Ligand positions A1–A4 are shared by two calcium sites, and therefore need to be occupied by bridging side chains (Glu, Asp). No protein ligands are observed in positions C1 and C5, which presumably are occupied by water molecules. (B) Relative position of the three calcium-binding sites with respect to two neighboring domains, illustrated for the EC1–EC2 interdomain region.

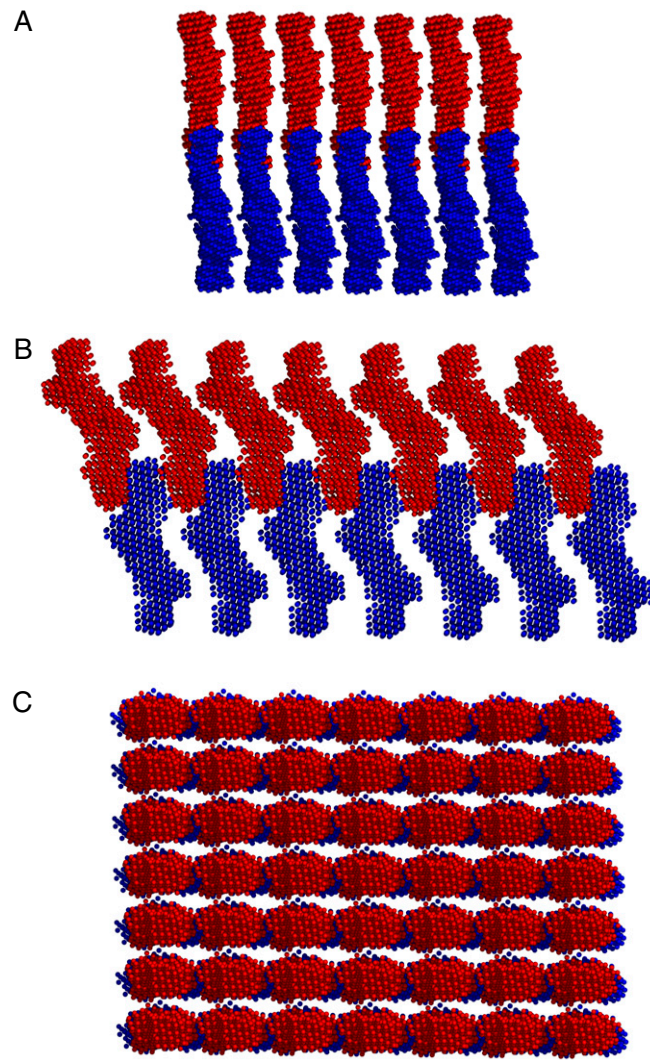

**Fig. S7.** Idealized array of Dsg-Ca ectodomains. Front (*A*), side (*B*), and top (*C*) views of the array, generated with the DAMMIN models from the fitting into the ET maps.

**Table S1. Calcium coordination in classical cadherin structures and equivalent residues in mDsg2 after multiple sequence alignment**

| Structures     | [————— B site —————] |               |             |      |               |               | [————— A site —————] |                      |      |      |      |      |
|----------------|----------------------|---------------|-------------|------|---------------|---------------|----------------------|----------------------|------|------|------|------|
|                | B6                   | B5            | B4          | B3   | B2            | A1            | A6                   | [————— C site —————] |      |      |      | C6   |
|                |                      |               |             |      |               |               |                      | A5                   | A4   | A3   | A2   |      |
| <i>EC1–EC2</i> |                      |               |             |      |               |               |                      |                      |      |      |      |      |
| E-Cad          | D195                 | ψ143          | N102        | ψ104 | D134          | D136          | D100                 | ψ101                 | E11  | D103 | E69  | D67  |
| N-Cad          | D194                 | ψ143          | N102        | ψ104 | D134          | D136          | D100                 | ψ101                 | E11  | D103 | E69  | D67  |
| C-Cad          | D195                 | ψ143          | N102        | ψ104 | D134          | D136          | D100                 | ψ101                 | E11  | D103 | E69  | D67  |
| mDsg2          | D194                 | ψ144          | N104        | ψ106 | D136          | D138          | D102                 | ψ103                 | E11  | D105 | E71  | D69  |
| <i>EC2–EC3</i> |                      |               |             |      |               |               |                      |                      |      |      |      |      |
| E-Cad          | N304                 | ψ254          | N215        | ψ217 | D246          | D248          | D213                 | ψ214                 | E119 | D216 | E182 | D180 |
| N-Cad          | N307                 | ψ256          | N217        | ψ219 | D248          | D250          | D215                 | ψ216                 | E119 | D218 | E181 | D179 |
| C-Cad          | N304                 | ψ254          | N215        | ψ217 | D246          | D248          | D213                 | ψ214                 | E119 | D216 | E182 | D180 |
| mDsg2          | N307                 | ψ256          | N217        | ψ219 | D248          | D250          | D215                 | ψ216                 | E121 | D218 | E181 | D179 |
| <i>EC3–EC4</i> |                      |               |             |      |               |               |                      |                      |      |      |      |      |
| E-Cad          | D415                 | Q365          | N327        | ψ328 | E358          | D360          | D325                 | ψ326                 | E232 | E328 | E291 | D289 |
| N-Cad          | D420                 | Q371          | N333        | ψ334 | D364          | D366          | D331                 | ψ332                 | E234 | E334 | E294 | D292 |
| C-Cad          | D414                 | Q365          | N327        | ψ328 | D358          | D360          | D325                 | ψ326                 | E232 | E328 | E291 | D289 |
| mDsg2          | <b>S424</b>          | <b>A375</b>   | <b>V334</b> | ψ335 | D368          | D370          | N332                 | ψ333                 | E234 | E335 | E294 | D292 |
| <i>EC4–EC5</i> |                      |               |             |      |               |               |                      |                      |      |      |      |      |
| E-Cad          | D517                 | ψ468          | N435        | ψ437 | D462          | D464          | D433                 | ψ434                 | E343 | D436 | E397 | D395 |
| N-Cad          | D525                 | ψ474          | N440        | ψ442 | D468          | D470          | D438                 | ψ439                 | E349 | D441 | E403 | D401 |
| C-Cad          | D515                 | ψ467          | N434        | ψ436 | D461          | D463          | D432                 | ψ433                 | E343 | D435 | E397 | D395 |
| mDsg2          | <u>(D525)</u>        | <u>(ψ476)</u> | N444        | ψ446 | <u>(D470)</u> | <u>(D472)</u> | D442                 | ψ443                 | E350 | D445 | E407 | D405 |

Site nomenclature as in Fig. S6. Main chain carbonyl binding is indicated with the ψ symbol. Residues in bold type are not conserved. Underlined residues are potentially conserved but appear difficult to model in a reasonable calcium-binding coordination. The dashed underlined residue can be modeled in binding coordination for only one of the two sites it is supposed to bridge. The C1 and C5 sites in Fig. S6 are water molecules completing the coordination of the third calcium ion.

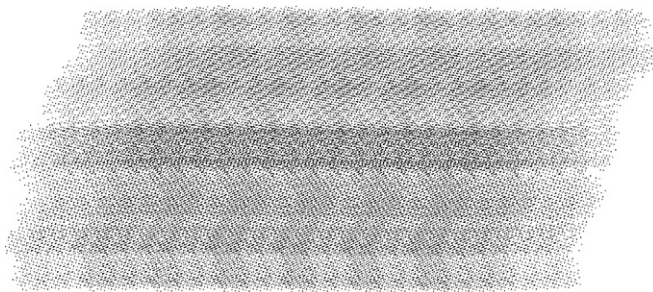**Movie S1.** Rotation around the vertical axis of the array of mDsg2 ectodomains, where the midline can be visualized.

[Movie S1](#)
